# Supplementary material
Source: PubMed Central journal article supplement (PMC3217123)
Supplement: NIHMS328180-supplement-02.pdf [file NIHMS328180-supplement-02.pdf]

**Supplemental Figure 1: Cell density-dependent changes in hepatocyte respiration following chronic alcohol (EtOH) consumption.** (A) The oxygen consumption rate (OCR) of primary hepatocytes isolated from control rats and plated at varying seeding densities (20,000, 40,000, or 60,000 cells/well) was measured, followed by sequential injections of oligomycin (O, 1  $\mu\text{g}/\text{mL}$ ), FCCP (F, 0.3  $\mu\text{M}$ ), and antimycin A plus rotenone (A+R, 10  $\mu\text{M}$  and 1  $\mu\text{M}$  respectively) to assess various parameters of mitochondrial function. (B) Effect of different seeding densities (20,000, 40,000, or 60,000 cells/well) of hepatocytes from EtOH-fed rats on mitochondrial function as examined following the same protocol as in (A). (C) Basal OCR of control and EtOH-fed rats as a function of cell densities. Results are mean  $\pm$  SEM.  $n=5$  for each group.

**Supplemental Figure 2: Chronic EtOH consumption increases cytochrome P450 2E1 (CYP2E1) protein.** Whole liver homogenates (25 µg protein) from control and EtOH-fed wild type and iNOS<sup>-/-</sup> mice were used for analysis of CYP2E1 (**A**) and aldehyde dehydrogenase 2 (ALDH2) (**B**) expression by SDS/PAGE followed by Western blotting. The densitometry of the CYP2E1 and ALDH2 bands were quantified from each group. Results are mean ± SEM. n=6 per group. \*p<0.0005 compared to the respective control mice.

**Supplemental Figure 3: Rate of NO release by DetaNONOate.** The rate of <sup>•</sup>NO released by DetaNONOate (250, 500, 1000 µM) was measured in media (pH 7.4) at 37°C using polarographic <sup>•</sup>NO electrode. Results are mean ± SEM. n=4 per group.
