# Supplementary material
Source: PubMed Central journal article supplement (PMC3217123)

# A

## Supplementary Figure 1

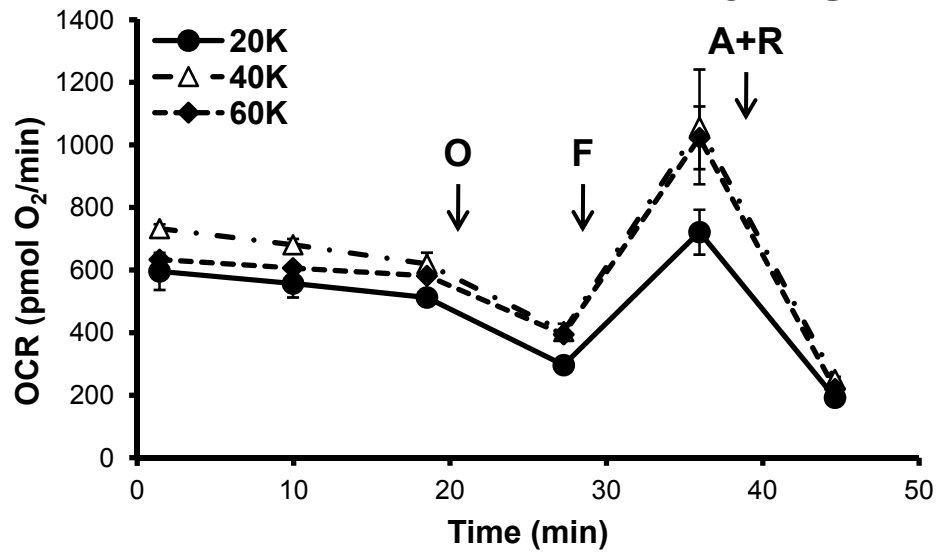

# B

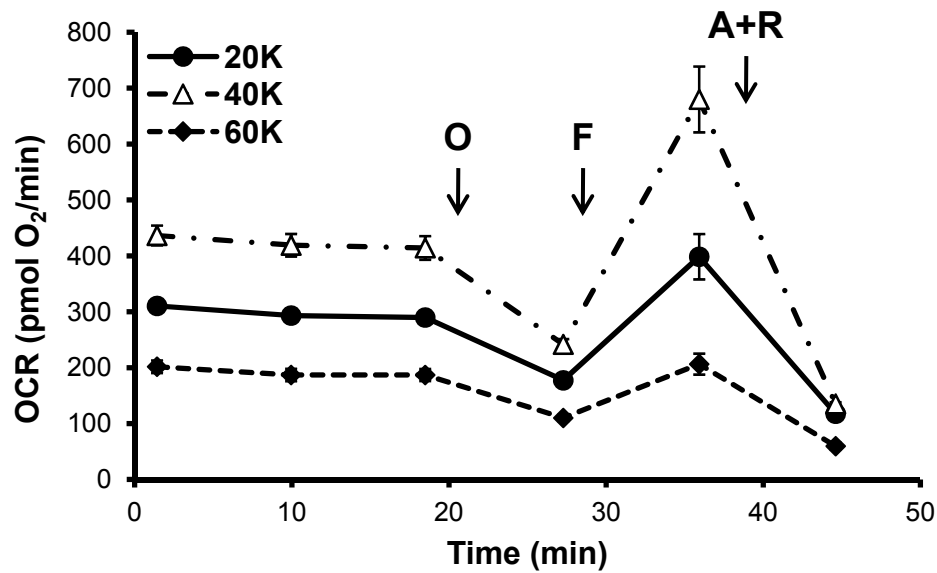

# C

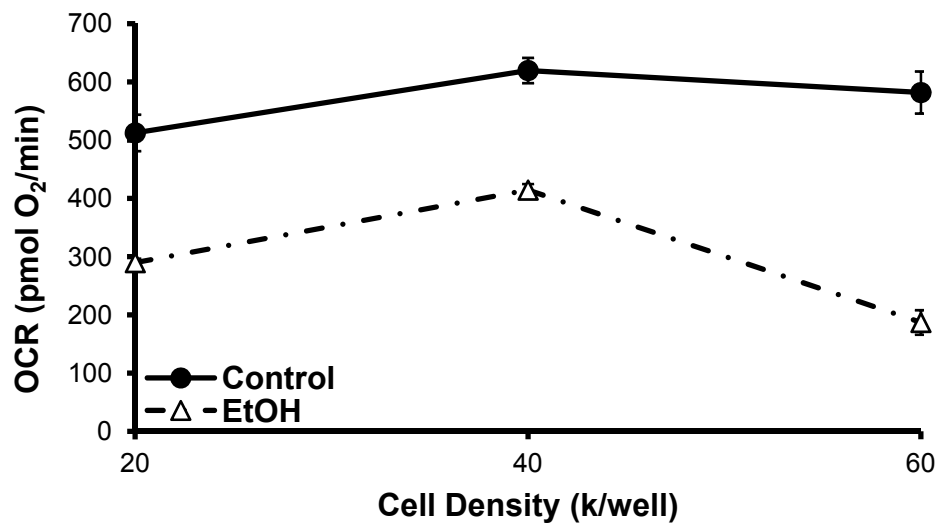

## Supplementary Figure 2

**A**

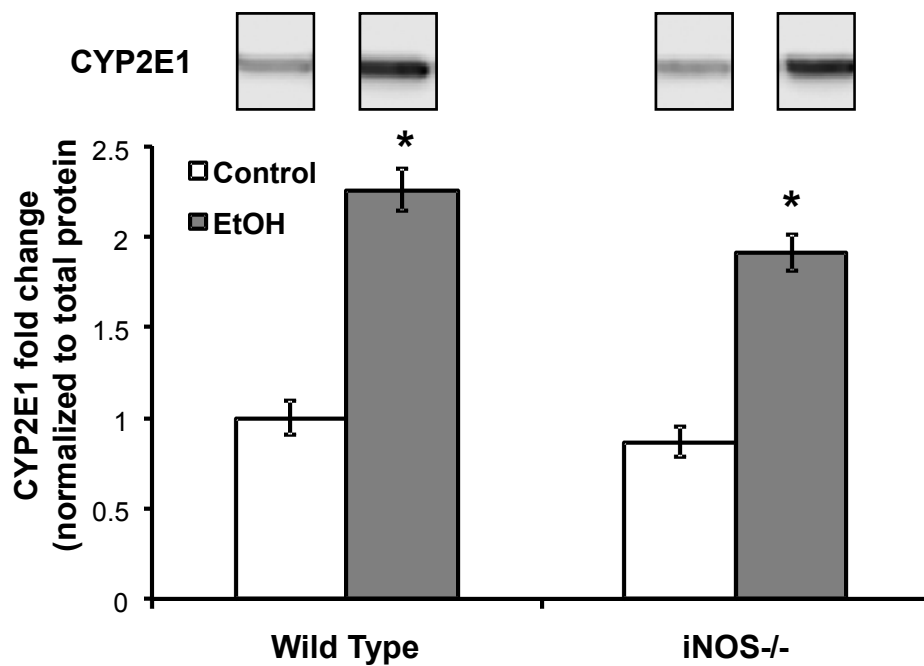

**B**

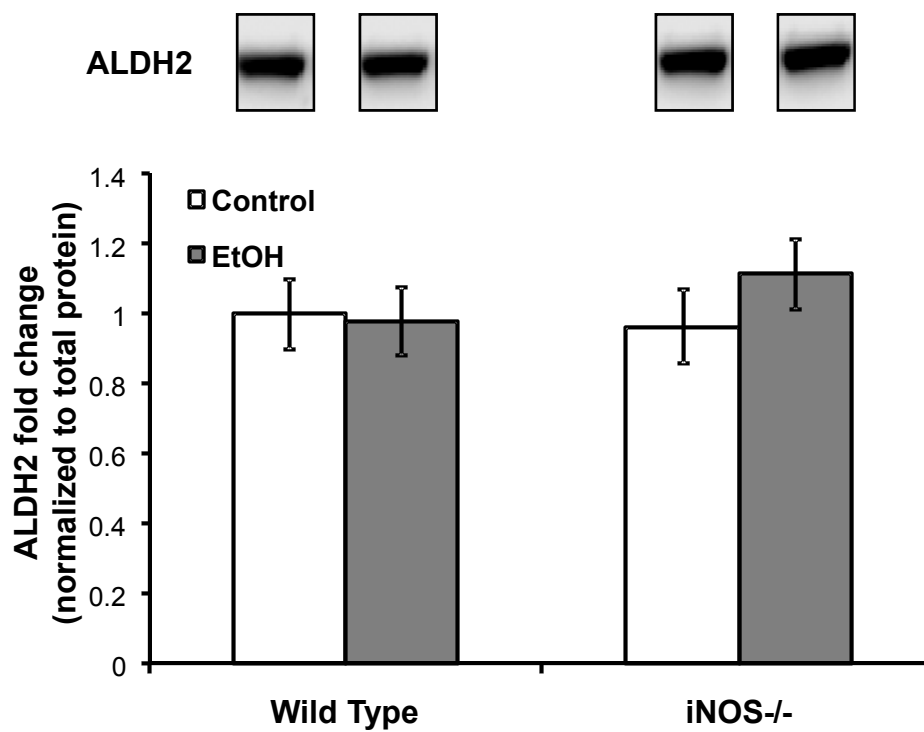

# Supplementary Figure 3

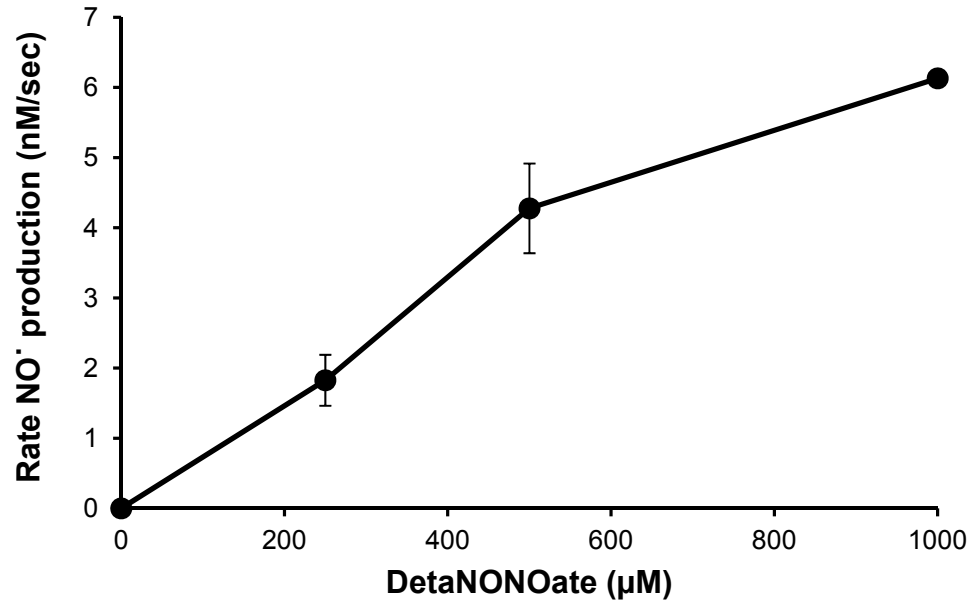

Supplement: NIHMS328180-supplement-01.pdf [file NIHMS328180-supplement-01.pdf]
